# Supplementary material for: Impact of Label Restriction on Checkpoint-Inhibitor Use in Bladder Cancer and Changes in Mortality
Source: PubMed Central journal article supplement (PMC9364375; doi:10.1093/jncics/pkac050), 2022-07-09
Supplement: pkac050_supplementary_data.pdf [file pkac050_supplementary_data.pdf]

## Supplementary Materials

Supplementary Table 1: Baseline characteristics of sample

| Category                           | Pre-label change |              | Post-label change |              | Total |              |
|------------------------------------|------------------|--------------|-------------------|--------------|-------|--------------|
|                                    | No.              | %            | No.               | %            | No.   | %            |
| Gender                             |                  |              |                   |              |       |              |
| Female                             | 205              | 24.7%        | 342               | 28.9%        | 547   | 27.2%        |
| Male                               | 624              | 75.3%        | 842               | 71.1%        | 1466  | 72.8%        |
| Missing                            | 0                |              | 1                 |              | 1     |              |
| Race/ethnicity                     |                  |              |                   |              |       |              |
| White                              | 578              | 76.2%        | 782               | 72.7%        | 1360  | 74.1%        |
| Black                              | 37               | 4.9%         | 48                | 4.5%         | 85    | 4.6%         |
| Latinx                             | 39               | 5.1%         | 36                | 3.3%         | 75    | 4.1%         |
| Other                              | 105              | 13.8%        | 210               | 19.5%        | 315   | 17.2%        |
| Missing                            | 70               |              | 109               |              | 179   |              |
| Therapy group                      |                  |              |                   |              |       |              |
| Carboplatin                        | 214              | 25.8%        | 280               | 23.6%        | 494   | 24.5%        |
| Cisplatin                          | 247              | 29.8%        | 336               | 28.4%        | 583   | 28.9%        |
| Immunotherapy                      | 368              | 44.4%        | 569               | 48.0%        | 937   | 46.5%        |
| Primary site                       |                  |              |                   |              |       |              |
| Bladder                            | 640              | 77.2%        | 893               | 75.4%        | 1533  | 76.1%        |
| Renal Pelvis                       | 107              | 12.9%        | 164               | 13.8%        | 271   | 13.5%        |
| Ureter                             | 76               | 9.2%         | 121               | 10.2%        | 197   | 9.8%         |
| Urethra                            | 6                | 0.7%         | 7                 | 0.6%         | 13    | 0.6%         |
| History of smoking                 | 614              | 74.1%        | 871               | 73.5%        | 1485  | 73.7%        |
| Missing                            | 0                |              | 2                 |              | 2     |              |
| Steroids                           | 39               | 4.7%         | 48                | 4.1%         | 87    | 4.3%         |
| Opioids                            | 48               | 5.8%         | 75                | 6.3%         | 123   | 6.1%         |
| ECOG PS: 2+                        | 155              | 24.1%        | 194               | 20.4%        | 349   | 21.9%        |
| Missing                            | 186              |              | 232               |              | 418   |              |
| Insurance                          |                  |              |                   |              |       |              |
| Commercial                         | 403              | 48.6%        | 643               | 54.3%        | 1046  | 51.9%        |
| Medicare                           | 196              | 23.6%        | 272               | 23.0%        | 468   | 23.2%        |
| Other/self pay/not specified       | 210              | 25.3%        | 247               | 20.8%        | 457   | 22.7%        |
| Other government insurance         | 20               | 2.4%         | 23                | 1.9%         | 43    | 2.1%         |
| PD-L1 tested <sup>a</sup>          | 55               | 6.6%         | 333               | 28.1%        | 388   | 19.3%        |
| PD-L1 positive <sup>a</sup>        | 17               | 32.7%        | 131               | 41.9%        | 148   | 40.5%        |
| Missing                            | 777              |              | 872               |              | 1649  |              |
| Age (median, IQR)                  | 72.1             | (67.0, 80.0) | 72.6              | (67.0, 81.0) | 72.4  | (67.0, 81.0) |
| BMI (median, IQR)                  | 26.8             | (22.9, 30.3) | 27.3              | (23.3, 30.6) | 27.1  | (23.1, 30.4) |
| Missing                            | 6                |              | 17                |              | 23    |              |
| Creatinine clearance (median, IQR) | 63.5             | (42.5, 79,3) | 63.3              | (41.1, 80.3) | 63.4  | (41.8, 80.1) |
| Missing                            | 34               |              | 56                |              | 90    |              |

<sup>a</sup> PD-L1 status was determined using recorded results from Dako 22C3 assays, Ventana SP142 assays, and written lab interpretations ("positive" or "negative"). Patients with results on any of these indicators were classified as "tested." We classified patients as PDL/1 positive if they had a combined positive score of  $\geq 10\%$ , percent staining  $\geq 5\%$ , or "positive" lab within 30 days after or any time prior to treatment initiation. Patients were classified as negative if they had at least one PD-L1 indicator on record (from any of the three fields) and no positive tests. ECOG PS, Eastern Cooperative Oncology Group Performance Status; PD-L1, programmed death-ligand 1; IQR, interquartile range
